# Supplementary material for: Ehrlichia and Rickettsia species in a diverse tick community found on wild birds and bird workers in the Rio Grande Valley (Texas, USA)
Source: Research Square preprint supplement (doi:10.21203/rs.3.rs-5634407/v1), 2024-12-27
Supplement: Supplementary file 1 [file e7b0cf93ca712ea677143efb.docx]

**Table 1**. Primers used for the molecular identification of tick species.

| **Target** | **Primers** | **Sequence 5’-3’** | **Amplicon size** | **Reference** |
| --- | --- | --- | --- | --- |
| 12S  rDNA | T1B  T2A | AAACTAGGATTAGATACCCT  AATGAGAGCGACGGGCGATGT | 360 pb | [27] |
| ITS2 | ITS2-7923-F  ITS2-7923-R | CGGATCCTTC (A/G) CTCGCCG (C/T) TACT  CCATCGATGTGAA (C/T) TGCAGGAC | 1.2 kb | [28] |
| COX1 | HCO2198  LCO1490 | GGTCAACAAATCATAAAGATATTGG  TAAACTTCAGGGTGACCAAAAAATCA | 601 pb | [29] |
| 16S rDNA | 16S+1  16S-1 | CTGCTCAATGATTTTTTAAATTGCTGTGG  CCGGTCTGAACTCAGATCAAGT | 460 pb | [30] |

**Table 2**. Ticks collected from birds during banding activities between 2019 to 2024. Acadian flycatcher (ACFL), Carolina wren (CARW), Clay-colored thrush (CCTH), Lincoln's Sparrow (LISP), Long-billed Thrasher (LBTH), Red-eyed vireo (REVI), Red-shouldered hawk (RSHA), Swainson's thrush (SWTH). Breeding in TX (B); Non-breeder in Texas (NB); Long-distance migrant (LD); Medium-distance migrant (MD); Non-migratory (NM). Larva (L); Nymph (N); Adult (A). Blank spaces mean none infested.

| **Birds**  **(n)** | **Migratory**  **status** | **Capture date** | ***Amblyomma geayi*** | ***Amblyomma inornatum*** | ***Amblyomma longirostre*** | ***Amblyomma maculatum*** | ***Amblyomma tenellum*** | ***Ixodes***  ***keiransi*** |
| --- | --- | --- | --- | --- | --- | --- | --- | --- |
| ACFL (2) | B, LD | 04/25/2023 |  |  | 2 (L, N) |  |  |  |
| CARW (1) | B, NM | 02/25/2024 |  |  |  | 1 (N) |  |  |
| CCTH (2) | B, NM | 10/01/2023  04/21/2024 |  | 1 (N) |  |  | 1 (N) |  |
| LBTH (3) | B, NM | 09/03/2023  08/18/2024 |  | 9 (2L, 4N, 3A) |  |  |  |  |
| LISP (1) | NB, MD | 01/04/2023 |  |  |  | 1 (N) |  |  |
| REVI (1) | B, LD | 05/12/2019 | 2 (L) |  |  |  |  |  |
| RSHA (1) | NB, MD | 02/01/2020 |  |  |  |  |  | 1 (N) |
| SWTH (1) | NB, LD | 05/19/2019 |  |  | 1 (L) |  |  |  |
|  |  | **Total** | **2** | **10** | **3** | **2** | **1** | **1** |
